# Supplementary material for: MicroRNA miR-274-5p Suppresses Found-in-Neurons Associated with Melanotic Mass Formation and Developmental Growth in Drosophila
Source: Insects. 2023 Aug 14;14(8):709. doi: 10.3390/insects14080709 (PMC10456003; doi:10.3390/insects14080709)
Supplement: Supplementary file 1 [file insects-14-00709-s001.zip]

Archive with 8 entries (8 files):
- Supplementary FigureS1.pdf
- __MACOSX/._Supplementary FigureS1.pdf
- Supplementary FigureS2.pdf
- __MACOSX/._Supplementary FigureS2.pdf
- Supplementary_TableS1.xlsx
- __MACOSX/._Supplementary_TableS1.xlsx
- Supplementary_TableS2.xlsx
- __MACOSX/._Supplementary_TableS2.xlsx
