# Supplementary material for: MicroRNA miR-274-5p Suppresses Found-in-Neurons Associated with Melanotic Mass Formation and Developmental Growth in Drosophila
Source: Insects. 2023 Aug 14;14(8):709. doi: 10.3390/insects14080709 (PMC10456003; doi:10.3390/insects14080709)
Supplement: Supplementary file 1 [file insects-14-00709-s001.zip › Supplementary_TableS1.xlsx]

## Sheet: Table S1
	Supplementary Table S1. Sequences of the oligoncleotides used in this study
	Name	Sequence (5' to 3')
	Dm-miR-274 overexpression-F	AAAGATATCGTGCATCCGTCTCGTGATTC
	Dm-miR-274 overexpression-R	AAACTCGAGATTGACAGCACACTTTCTTAGC
	miR-RT-adaptor	AGGCAGTGGTATCAACGCAGAGTACTTTTTTTTTTTTTTTTTTTTTTTTTTTTTTTTVN
	Universal-R	AGGCAGTGGTATCAACGCAG
	Dm_U6 snRNA-F	CAAAATCGTGAAGCGTTCCA
	Dm-miR-274-5p-F	TTTGTGACCGACACTAACGGGTA
	Dm-miR-274-3p-F	CTCGTTTTTGCGATCACAAATTA
	Dm_rp49-F	CTGCCCACCGGATTCAAG
	Dm_rp49-R	CGATCTCGCCGCAGTAAAC
	upd3-F	ACTGGGAGAACACCTGCAAT
	upd3-R	GCCCGTTTGGTTCTGTAGAT
	socs36E-F	CAGTCAGCAATATGTTGTCG
	socs36E-R	ACTTGCAGCATCGTCGCTTC
	fne-mRNA-level-F	GAGTCGACGCGAAAGAAAGT
	fne-mRNA-level-R	GCGAGACGAAATCGAAAAAG
	fne_3UTR-F	AAAACTCGAGCAAAATAACCGCCGCAAC
	fne_3UTR-R	AAAGCGGCCGCGATTTTCGGGTGTAGCTTCG
	fne_3UTR_mt-F	GCCACATCTTCATATTGCTAAGCTTAATGACACACGCGCCTGCGCAGCAGC
	fne_3UTR_mt-R	GCTGCTGCGCAGGCGCGTGTGTCATTAAGCTTAGCAATATGAAGATGTGGC
	fne_extension1-F	ACGAAACGAAAATCGAAGATATAGC
	fne_extension1-R	GAGTGTGTGTGTTTGGGTGCTT
	fne_extension2-F	TCGATAAAACGTGCGACAGATT
	fne_extension2-R	TGGCATTCTAACGCTCTTTGG
	Itgbn-F	CTCGCCGGCAACTACTTAAC
	Itgbn-R	GGACAGCCTGATCACTGGTT
	nfne-F	CGCCAACAATCCGAGCAATA
	nfne-R	AGTCATGGCATTTCCCGGTA
	upd1-F	CATCCTACTCGTCCTGCTCC
	upd1-R	TGATTGGGATGCTGAGCTGA
	upd2-F	CGGAACATCACGATGAGCGAAT
	upd2-R	TCGGCAGGAACTTGTACTCG
	InR-F	AGGTGTTTGCCAAGGAATTG
	InR-R	ATTTTTCGCTGGGGATTTCT
