# Supplementary material for: MicroRNA miR-274-5p Suppresses Found-in-Neurons Associated with Melanotic Mass Formation and Developmental Growth in Drosophila
Source: Insects. 2023 Aug 14;14(8):709. doi: 10.3390/insects14080709 (PMC10456003; doi:10.3390/insects14080709)
Supplement: Supplementary file 1 [file insects-14-00709-s001.zip › Supplementary_TableS2.xlsx]

## Sheet: Table S1
	Supplementary Table S1. Potential target genes predicted using TargetScanfly
	miRNA	Target genes
	miR-274-5p	CG32235, CG34394, CG2246, CG9705, CG13893, beta-PheRS, para, Gdh, CG15822, CG5214, ste14, CG11436, knk, CG7639, CG10195, Sam-S, CG7927, Prat, ex, CG11777, CG12942, CG42674, slif, Gyf, CG11147, NKAIN, emp, CG31808, Psa, CG1544, Glut4EF, axo, CG7368, tal-3A, CG7872, Dok, tal-2A, Mcr, CG42245, CG3797, tal-1A, CG12012, Fgop2, CG13721, CG14853, Osi7, Ide, tal-AA, plum, Fhos, isoQC ,Gasp, bru1, wts, sd…
